# Supplementary material for: Computational investigation of the photochemical deoxygenation of thiophene- S-oxide and selenophene- Se-oxide
Source: Royal Society of Chemistry journal article supplement (doi:10.1039/c3pp50382h), 2014-01-06
Supplement: c3pp50382h.pdf [file c3pp50382h.pdf]

# Computational Investigation of the Photochemical Deoxygenation of Thiophene-*S*-oxide and Selenophene-*Se*-oxide

Stacey A. Stoffregen,<sup>\*a</sup> Stephanie Y. Lee,<sup>a</sup> Pearl Dickerson,<sup>b</sup> and William S. Jenks<sup>\*b</sup>

<sup>a</sup> University of Wisconsin-River Falls, River Falls, Wisconsin, USA. Tel: 1(715)425-3209; E-mail: stacey.stoffregen@uwrf.edu

<sup>b</sup> Department of Chemistry, Iowa State University, Ames, Iowa, USA. Tel: 1(515)294-4711; E-mail: wsjenks@iastate.edu

## Table of Contents

|                                                                                                                                                              |    |
|--------------------------------------------------------------------------------------------------------------------------------------------------------------|----|
| Illustrated active space orbitals for thiophene- <i>S</i> -oxide (TO)                                                                                        | 2  |
| Thiophene- <i>S</i> -oxide ground state angle of S out of plane of thiophene ring versus S-O distance. CASSCF/6-31G(d)                                       | 3  |
| Control for basis sets in computational optimizations                                                                                                        | 4  |
| Comparison of computed (CASSCF/6-31G(d)) thiophene- <i>S</i> -oxide geometries with reported values for 2,5-diphenylthiophene- <i>S</i> -oxide and thiophene |    |
| Thiophene- <i>S</i> -oxide coordinates and frequencies of optimized structures                                                                               | 6  |
| Selenophene- <i>Se</i> -oxide coordinates and frequencies of optimized structures                                                                            | 20 |
| Dibenzothiophene- <i>S</i> -oxide coordinates and frequencies of optimized structures                                                                        | 22 |
| References                                                                                                                                                   | 25 |

## Illustrated Active Space orbitals for Thiophene-S-oxide (TO)

These represent the HF level orbitals used as starting points for the CASSCF calculations for thiophene-S-oxide. An analogous set was used for selenophene-Se-oxide.

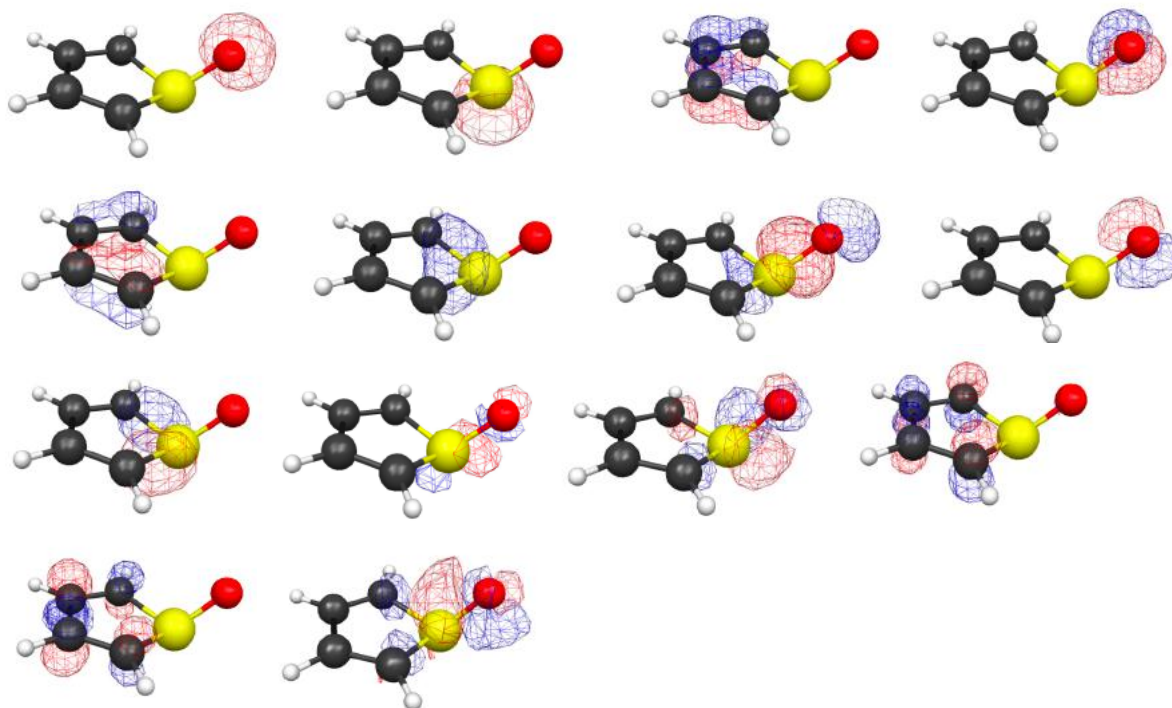

## Thiophene-S-oxide: Angle of S out of plane of thiophene ring versus S-O distance. CASSCF/6-31G(d)

Note that the angle nears the asymptotic limit of zero (planar thiophene) as the S-O distance passes 3 Å.

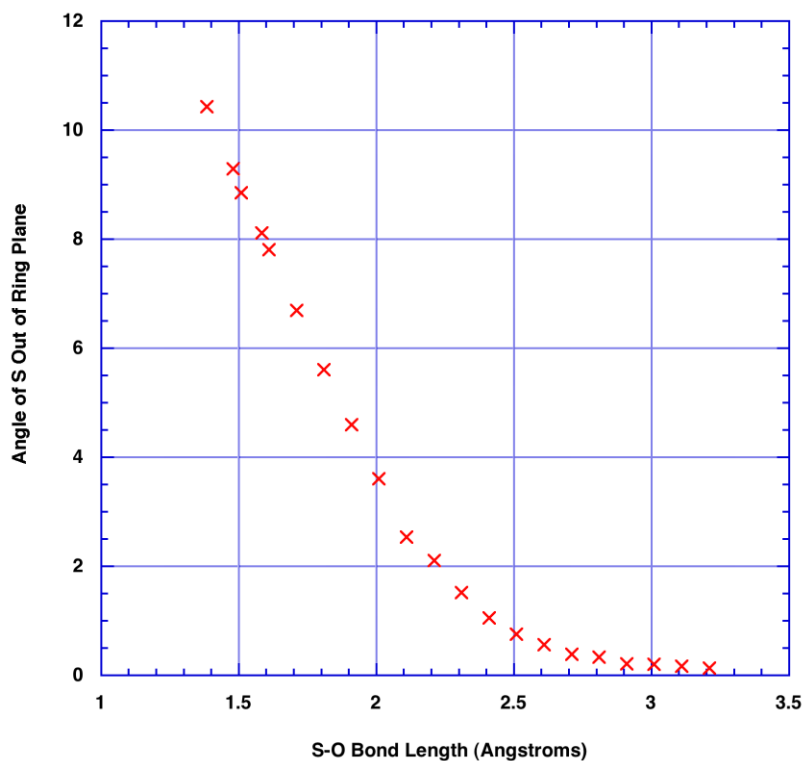

## Control for basis sets in computational optimizations

The figure below illustrates the relative energies for TO in its ground electronic state with S–O at fixed distance. The red data were obtained with full CASSCF/G3Large\* and the blue data were obtained using geometries from CASSCF/6-31G(d), i.e., CASSCF/G3Large\* vs. CASSCF/G3Large\*//CASSCF/6-31G(d). Due to the only minor difference, only the latter calculations were done in the rest of the study.

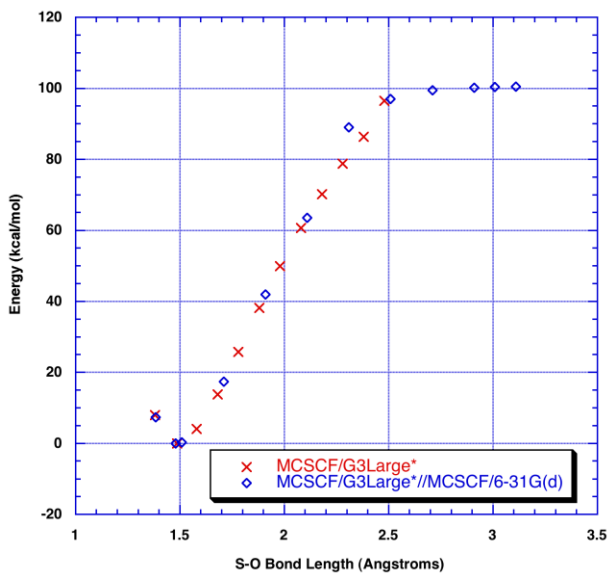

## Comparison of computed (CASSCF/6-31G(d)) thiophene-*S*-oxide geometries with reported values for 2,5-diphenylthiophene-*S*-oxide and thiophene

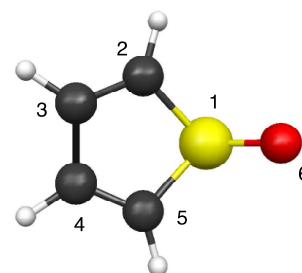

| Atoms                                                                                                       | Bond Length (Å)            | Atoms    | Angle (°)                  |
|-------------------------------------------------------------------------------------------------------------|----------------------------|----------|----------------------------|
| <b>S<sub>0</sub> <sup>1</sup>A' (Ground State)</b>                                                          |                            |          |                            |
| S1-O6                                                                                                       | 1.510 (1.484) <sup>a</sup> | O6-S1-C2 | 113.9 (112.6) <sup>a</sup> |
| S1-C2                                                                                                       | 1.787 (1.781) <sup>a</sup> | S1-C2-C3 | 112.1 (108.9) <sup>a</sup> |
| C2-C3                                                                                                       | 1.345 (1.345) <sup>a</sup> | C2-C3-C4 | 112.8 (114.5) <sup>a</sup> |
| C3-C4                                                                                                       | 1.471 (1.433) <sup>a</sup> | C2-S1-C5 | 89.3 (91.3) <sup>a</sup>   |
| <b>T<sub>1</sub> <sup>3</sup>A''</b>                                                                        |                            |          |                            |
| S1-O6                                                                                                       | 1.513                      | O6-S1-C2 | 110.9                      |
| S1-C2                                                                                                       | 1.782                      | S1-C2-C3 | 113.7                      |
| C2-C3                                                                                                       | 1.452                      | C2-C3-C4 | 112.2                      |
| C3-C4                                                                                                       | 1.363                      | C2-S1-C5 | 87.3                       |
| <b>T<sub>2</sub> <sup>3</sup>A' (constrained S-O)</b>                                                       |                            |          |                            |
| S1-O6                                                                                                       | 1.500 <sup>c</sup>         | O6-S1-C2 | 120.6                      |
| S1-C2                                                                                                       | 1.736                      | S1-C2-C3 | 108.5                      |
| C2-C3                                                                                                       | 1.382                      | C2-C3-C4 | 113.5                      |
| C3-C4                                                                                                       | 1.426                      | C2-S1-C5 | 93.5                       |
| <b>T<sub>2</sub> <sup>3</sup>A' (constrained S-O)<br/>                     Thiophene + O(<sup>3</sup>P)</b> |                            |          |                            |
| S1-O6                                                                                                       | 4.000                      | O6-S1-C2 | 102.6                      |
| S1-C2                                                                                                       | 1.763 (1.714) <sup>b</sup> | S1-C2-C3 | 111.7 (111.5) <sup>b</sup> |
| C2-C3                                                                                                       | 1.362 (1.370) <sup>b</sup> | C2-C3-C4 | 113.1 (112.4) <sup>b</sup> |
| C3-C4                                                                                                       | 1.433 (1.432) <sup>b</sup> | C2-S1-C5 | 90.4 (92.2) <sup>b</sup>   |
| <b>S<sub>1</sub> <sup>1</sup>A' (Excited State)<br/>                     (constrained S-O)</b>              |                            |          |                            |
| S1-O6                                                                                                       | 1.500 <sup>c</sup>         | O6-S1-C2 | 115.5                      |
| S1-C2                                                                                                       | 1.761                      | S1-C2-C3 | 108.2                      |
| C2-C3                                                                                                       | 1.383                      | C2-C3-C4 | 114.0                      |
| C3-C4                                                                                                       | 1.420                      | C2-S1-C5 | 92.4                       |
| <b>S<sub>2</sub> <sup>1</sup>A'' (constrained S-O)</b>                                                      |                            |          |                            |
| S1-O6                                                                                                       | 1.510 <sup>c</sup>         | O6-S1-C2 | 106.4                      |
| S1-C2                                                                                                       | 1.758                      | S1-C2-C3 | 111.3                      |
| C2-C3                                                                                                       | 1.395                      | C2-C3-C4 | 113.3                      |
| C3-C4                                                                                                       | 1.396                      | C2-S1-C5 | 90.6                       |

<sup>a</sup> Values in parentheses are from the crystal structure of 2,5-diphenylthiophene-*S*-oxide.<sup>1</sup> <sup>b</sup> Values in parentheses are experimental parameters for thiophene.<sup>2</sup> <sup>c</sup>Constrained to this value.

## Coordinates

### Thiophene-S-oxide-Coordinates: S<sub>0</sub> A' State

#### 1.38Å S-O Bond Length

|                |      |                 |              |               |
|----------------|------|-----------------|--------------|---------------|
| S              | 16.0 | 1.6100335373    | -.5021242834 | .0000000000   |
| H              | 1.0  | -1.7424797485   | .1423629575  | -1.3163189517 |
| C              | 6.0  | -.8450953250    | .0384292144  | -.7355988566  |
| H              | 1.0  | .6498815566     | -.1694727270 | -2.2937245745 |
| C              | 6.0  | .3859728527     | -.1147481045 | -1.2555271751 |
| O              | 8.0  | 2.7246512577    | .3172155488  | .0000000000   |
| TOTAL ENERGY = |      | -626.2075682419 |              |               |

#### 1.48Å S-O Bond Length

|                |      |                 |               |               |
|----------------|------|-----------------|---------------|---------------|
| S              | 16.0 | 1.6727391380    | -0.4086038296 | 0.0000000000  |
| H              | 1.0  | -1.7311402701   | -0.3046121733 | -1.3174730480 |
| C              | 6.0  | -0.8292828761   | -0.2751506261 | -0.7356040397 |
| H              | 1.0  | 0.6869788356    | -0.2455974950 | -2.2915215191 |
| C              | 6.0  | 0.4102634491    | -0.2389025392 | -1.2560002571 |
| O              | 8.0  | 2.6774813331    | 0.6780852342  | 0.0000000000  |
| TOTAL ENERGY = |      | -626.2251080482 |               |               |

#### 1.51Å S-O Bond Length:Optimized Ground State

|                |      |                 |              |               |
|----------------|------|-----------------|--------------|---------------|
| S              | 16.0 | 1.5867450935    | -.5305123333 | .0000000000   |
| H              | 1.0  | -1.7385686200   | .1924410918  | -1.3177754645 |
| C              | 6.0  | -.8472477369    | .0538425381  | -.7355520953  |
| H              | 1.0  | .6501665394     | -.1953546969 | -2.2910690103 |
| C              | 6.0  | .3773759978     | -.1400381860 | -1.2561617749 |
| O              | 8.0  | 2.7868025461    | .3857308394  | .0000000000   |
| TOTAL ENERGY = |      | -626.2259228775 |              |               |

|      |    |            |           |          |
|------|----|------------|-----------|----------|
| MODE | 1  | FREQUENCY= | 0.00002   | (CM**-1) |
| MODE | 2  | FREQUENCY= | 0.00002   | (CM**-1) |
| MODE | 3  | FREQUENCY= | 0.00000   | (CM**-1) |
| MODE | 4  | FREQUENCY= | 0.00000   | (CM**-1) |
| MODE | 5  | FREQUENCY= | 0.00002   | (CM**-1) |
| MODE | 6  | FREQUENCY= | 0.00002   | (CM**-1) |
| MODE | 7  | FREQUENCY= | 193.90005 | (CM**-1) |
| MODE | 8  | FREQUENCY= | 275.72225 | (CM**-1) |
| MODE | 9  | FREQUENCY= | 488.95570 | (CM**-1) |
| MODE | 10 | FREQUENCY= | 520.24250 | (CM**-1) |
| MODE | 11 | FREQUENCY= | 571.36039 | (CM**-1) |
| MODE | 12 | FREQUENCY= | 690.70983 | (CM**-1) |
| MODE | 13 | FREQUENCY= | 723.48344 | (CM**-1) |
| MODE | 14 | FREQUENCY= | 745.63818 | (CM**-1) |

|      |    |            |            |          |
|------|----|------------|------------|----------|
| MODE | 15 | FREQUENCY= | 813.85325  | (CM**-1) |
| MODE | 16 | FREQUENCY= | 924.48383  | (CM**-1) |
| MODE | 17 | FREQUENCY= | 938.09231  | (CM**-1) |
| MODE | 18 | FREQUENCY= | 945.99151  | (CM**-1) |
| MODE | 19 | FREQUENCY= | 1052.56239 | (CM**-1) |
| MODE | 20 | FREQUENCY= | 1100.83120 | (CM**-1) |
| MODE | 21 | FREQUENCY= | 1196.26259 | (CM**-1) |
| MODE | 22 | FREQUENCY= | 1201.55142 | (CM**-1) |
| MODE | 23 | FREQUENCY= | 1403.13108 | (CM**-1) |
| MODE | 24 | FREQUENCY= | 1495.64545 | (CM**-1) |
| MODE | 25 | FREQUENCY= | 1629.10246 | (CM**-1) |
| MODE | 26 | FREQUENCY= | 1712.92831 | (CM**-1) |
| MODE | 27 | FREQUENCY= | 3403.76434 | (CM**-1) |
| MODE | 28 | FREQUENCY= | 3415.96688 | (CM**-1) |
| MODE | 29 | FREQUENCY= | 3449.47482 | (CM**-1) |
| MODE | 30 | FREQUENCY= | 3451.84275 | (CM**-1) |

1.58Å S-O Bond Length

|                |      |                 |               |               |
|----------------|------|-----------------|---------------|---------------|
| S              | 16.0 | 1.5731680184    | -0.5471732880 | 0.0000000000  |
| H              | 1.0  | -1.7361794202   | 0.2190985962  | -1.3187065043 |
| C              | 6.0  | -0.8488027387   | 0.0624270806  | -0.7353405342 |
| H              | 1.0  | 0.6497044334    | -0.2085852363 | -2.2893644108 |
| C              | 6.0  | 0.3722532812    | -0.1530533349 | -1.2561807426 |
| O              | 8.0  | 2.8237185457    | 0.4239902420  | 0.0000000000  |
| TOTAL ENERGY = |      | -626.2219823681 |               |               |

1.61Å S-O Bond Length

|                |      |                 |              |               |
|----------------|------|-----------------|--------------|---------------|
| S              | 16.0 | 1.5684507073    | -.5536988404 | .0000000000   |
| H              | 1.0  | -1.7349877848   | .2289320905  | -1.3190279851 |
| C              | 6.0  | -.8490479016    | .0660836885  | -.7352720289  |
| H              | 1.0  | .6490624898     | -.2143375696 | -2.2888475037 |
| C              | 6.0  | .3704877073     | -.1581051654 | -1.2561367795 |
| O              | 8.0  | 2.8360957267    | .4386133046  | .0000000000   |
| TOTAL ENERGY = |      | -626.2190401201 |              |               |

1.71Å S-O Bond Length

|                |      |                 |               |               |
|----------------|------|-----------------|---------------|---------------|
| S              | 16.0 | 1.5505550562    | -0.5785319443 | 0.0000000000  |
| H              | 1.0  | -1.7292560127   | 0.2686204345  | -1.3199364793 |
| C              | 6.0  | -0.8496329616   | 0.0799208951  | -0.7347407529 |
| H              | 1.0  | 0.6462285106    | -0.2360701004 | -2.2869379201 |
| C              | 6.0  | 0.3637469446    | -0.1770245423 | -1.2559172530 |
| O              | 8.0  | 2.8824942260    | 0.4936148763  | 0.0000000000  |
| TOTAL ENERGY = |      | -626.2036363175 |               |               |

1.81Å S-O Bond Length

|   |      |               |               |               |
|---|------|---------------|---------------|---------------|
| S | 16.0 | 1.5329814494  | -0.6056694524 | 0.0000000000  |
| H | 1.0  | -1.7213729384 | 0.3091587132  | -1.3207991545 |

|                |     |                 |               |               |
|----------------|-----|-----------------|---------------|---------------|
| C              | 6.0 | -0.8487172817   | 0.0952428439  | -0.7341306392 |
| H              | 1.0 | 0.6423576734    | -0.2591002735 | -2.2851846298 |
| C              | 6.0 | 0.3575719868    | -0.1958936578 | -1.2553896558 |
| O              | 8.0 | 2.9250077501    | 0.5509758802  | 0.0000000000  |
| TOTAL ENERGY = |     | -626.1849411677 |               |               |

#### 1.91Å S-O Bond Length

|                |      |                 |               |               |
|----------------|------|-----------------|---------------|---------------|
| S              | 16.0 | 1.5156053589    | -0.6361449207 | 0.0000000000  |
| H              | 1.0  | -1.7098934981   | 0.3531332042  | -1.3216605194 |
| C              | 6.0  | -0.8453974482   | 0.1125672049  | -0.7334819673 |
| H              | 1.0  | 0.6383061170    | -0.2828499702 | -2.2836243153 |
| C              | 6.0  | 0.3524746886    | -0.2147481509 | -1.2546816649 |
| O              | 8.0  | 2.9614716452    | 0.6116402334  | 0.0000000000  |
| TOTAL ENERGY = |      | -626.1658436629 |               |               |

#### 2.01Å S-O Bond Length

|                |      |                 |               |               |
|----------------|------|-----------------|---------------|---------------|
| S              | 16.0 | 1.4987569804    | -0.6726131854 | 0.0000000000  |
| H              | 1.0  | -1.6923136717   | 0.4042484405  | -1.3223115621 |
| C              | 6.0  | -0.8376853549   | 0.1339753666  | -0.7328322794 |
| H              | 1.0  | 0.6349109046    | -0.3083783865 | -2.2824093303 |
| C              | 6.0  | 0.3491614529    | -0.2342462783 | -1.2540422894 |
| O              | 8.0  | 2.9867617992    | 0.6784459243  | 0.0000000000  |
| TOTAL ENERGY = |      | -626.1478826791 |               |               |

#### 2.11Å S-O Bond Length

|                |      |                 |              |               |
|----------------|------|-----------------|--------------|---------------|
| S              | 16.0 | 1.4828387955    | -.7222748441 | .0000000000   |
| H              | 1.0  | -1.6588109070   | .4777038029  | -1.3232799099 |
| C              | 6.0  | -.8197909963    | .1651772405  | -.7323567939  |
| H              | 1.0  | .6351047070     | -.3347705527 | -2.2816572131 |
| C              | 6.0  | .3499152432     | -.2561522165 | -1.2536004821 |
| O              | 8.0  | 2.9863542806    | .7578200110  | .0000000000   |
| TOTAL ENERGY = |      | -626.1319830294 |              |               |

#### 2.21Å S-O Bond Length

|                |      |                 |               |               |
|----------------|------|-----------------|---------------|---------------|
| S              | 16.0 | 1.4830224414    | -0.7537988454 | 0.0000000000  |
| H              | 1.0  | -1.6678225449   | 0.5021539123  | -1.3150730466 |
| C              | 6.0  | -0.8309535332   | 0.1775430059  | -0.7272713869 |
| H              | 1.0  | 0.5994550867    | -0.3527556957 | -2.2943512788 |
| C              | 6.0  | 0.3277915961    | -0.2637305109 | -1.2632454349 |
| O              | 8.0  | 3.0415604894    | 0.8128348353  | 0.0000000000  |
| TOTAL ENERGY = |      | -626.1155598513 |               |               |

#### 2.31Å S-O Bond Length

|   |      |               |               |               |
|---|------|---------------|---------------|---------------|
| S | 16.0 | 1.4672563703  | -0.7909090412 | 0.0000000000  |
| H | 1.0  | -1.6480815270 | 0.5464252346  | -1.3144931477 |
| C | 6.0  | -0.8223743103 | 0.1972414147  | -0.7249435846 |
| H | 1.0  | 0.5914128542  | -0.3772854262 | -2.2927777639 |



|                |     |                 |               |               |
|----------------|-----|-----------------|---------------|---------------|
| C              | 6.0 | 0.3246182652    | -0.2795354303 | -1.2611679771 |
| O              | 8.0 | 3.0634894571    | 0.8786841519  | 0.0000000000  |
| TOTAL ENERGY = |     | -626.1061524216 |               |               |

#### 2.41Å S-O Bond Length

|                |      |                 |               |               |
|----------------|------|-----------------|---------------|---------------|
| S              | 16.0 | 1.4506107819    | -0.8195331326 | 0.0000000000  |
| H              | 1.0  | -1.6367350078   | 0.5768648581  | -1.3136196813 |
| C              | 6.0  | -0.8196927314   | 0.2101375937  | -0.7225152450 |
| H              | 1.0  | 0.5815763357    | -0.3981553250 | -2.2905043284 |
| C              | 6.0  | 0.3187470078    | -0.2934265946 | -1.2584459067 |
| O              | 8.0  | 3.1013579144    | 0.9361875632  | 0.0000000000  |
| TOTAL ENERGY = |      | -626.1000496078 |               |               |

#### 2.51Å S-O Bond Length

|                |      |                |               |               |
|----------------|------|----------------|---------------|---------------|
| S              | 16.0 | 1.4340595230   | -0.8410633973 | 0.0000000000  |
| H              | 1.0  | -1.6341165106  | 0.5936572799  | -1.3131488297 |
| C              | 6.0  | -0.8226659751  | 0.2165045656  | -0.7207615650 |
| H              | 1.0  | 0.5685525627   | -0.4166887997 | -2.2887868773 |
| C              | 6.0  | 0.3100174335   | -0.3051434997 | -1.2562291677 |
| O              | 8.0  | 3.1533131323   | 0.9874710578  | 0.0000000000  |
| TOTAL ENERGY = |      | -626.096562771 |               |               |

#### 2.61Å S-O Bond Length

|                |      |                 |               |               |
|----------------|------|-----------------|---------------|---------------|
| S              | 16.0 | 1.4177708197    | -0.8560969459 | 0.0000000000  |
| H              | 1.0  | -1.6389028176   | 0.5999923431  | -1.3132069757 |
| C              | 6.0  | -0.8311299942   | 0.2166947882  | -0.7196470386 |
| H              | 1.0  | 0.5545585060    | -0.4292923491 | -2.2875781667 |
| C              | 6.0  | 0.2985398800    | -0.3153362863 | -1.2545496949 |
| O              | 8.0  | 3.2181610086    | 1.0333200359  | 0.0000000000  |
| TOTAL ENERGY = |      | -626.0946286349 |               |               |

#### 2.71Å S-O Bond Length

|                |      |                 |               |               |
|----------------|------|-----------------|---------------|---------------|
| S              | 16.0 | 1.4017907632    | -0.8711348237 | 0.0000000000  |
| H              | 1.0  | -1.6443037085   | 0.6058066217  | -1.3129844855 |
| C              | 6.0  | -0.8396635352   | 0.2167062046  | -0.7188543089 |
| H              | 1.0  | 0.5404738359    | -0.4423340230 | -2.2867109624 |
| C              | 6.0  | 0.2865620505    | -0.3251584822 | -1.2534402018 |
| O              | 8.0  | 3.2833357702    | 1.0790107392  | 0.0000000000  |
| TOTAL ENERGY = |      | -626.0935693455 |               |               |

#### 2.81Å S-O Bond Length

|   |      |               |               |               |
|---|------|---------------|---------------|---------------|
| S | 16.0 | 1.3857739230  | -0.8859613246 | 0.0000000000  |
| H | 1.0  | -1.6506387121 | 0.6099604954  | -1.3126662217 |
| C | 6.0  | -0.8486669415 | 0.2157760775  | -0.7182567475 |
| H | 1.0  | 0.5273472075  | -0.4531199551 | -2.2860838869 |
| C | 6.0  | 0.2746307090  | -0.3339541490 | -1.2526685791 |
| O | 8.0  | 3.3492163110  | 1.1240763811  | 0.0000000000  |

TOTAL ENERGY = -626.0929900427

2.91Å S-O Bond Length

|                               |      |               |               |               |
|-------------------------------|------|---------------|---------------|---------------|
| S                             | 16.0 | 1.3699577590  | -0.9001647499 | 0.0000000000  |
| H                             | 1.0  | -1.6571420417 | 0.6137755599  | -1.3127332517 |
| C                             | 6.0  | -0.8578564304 | 0.2146630728  | -0.7179367016 |
| H                             | 1.0  | 0.5130112845  | -0.4649539529 | -2.2856765375 |
| C                             | 6.0  | 0.2621193466  | -0.3431001799 | -1.2520824021 |
| O                             | 8.0  | 3.4160188484  | 1.1688714520  | 0.0000000000  |
| TOTAL ENERGY = -626.092665288 |      |               |               |               |

3.01Å S-O Bond Length

|                                |      |               |               |               |
|--------------------------------|------|---------------|---------------|---------------|
| S                              | 16.0 | 1.3542193622  | -0.9145222076 | 0.0000000000  |
| H                              | 1.0  | -1.6643198360 | 0.6167528767  | -1.3125420153 |
| C                              | 6.0  | -0.8673378992 | 0.2130479886  | -0.7176742035 |
| H                              | 1.0  | 0.4997302634  | -0.4748794388 | -2.2853389193 |
| C                              | 6.0  | 0.2496925057  | -0.3514073436 | -1.2517109852 |
| O                              | 8.0  | 3.4829292824  | 1.2133341385  | 0.0000000000  |
| TOTAL ENERGY = -626.0924696317 |      |               |               |               |

3.11Å S-O Bond Length

|                                |      |               |               |               |
|--------------------------------|------|---------------|---------------|---------------|
| S                              | 16.0 | 1.3388683371  | -0.9287118737 | 0.0000000000  |
| H                              | 1.0  | -1.6717288195 | 0.6194778649  | -1.3124047053 |
| C                              | 6.0  | -0.8770923357 | 0.2112569210  | -0.7174791149 |
| H                              | 1.0  | 0.4853602113  | -0.4845148743 | -2.2856488037 |
| C                              | 6.0  | 0.2367478542  | -0.3596699267 | -1.2516300692 |
| O                              | 8.0  | 3.5504183194  | 1.2576538412  | 0.0000000000  |
| TOTAL ENERGY = -626.0932559721 |      |               |               |               |

3.21Å S-O Bond Length

|                                |      |               |               |               |
|--------------------------------|------|---------------|---------------|---------------|
| S                              | 16.0 | 1.3231592038  | -0.9424149549 | 0.0000000000  |
| H                              | 1.0  | -1.6792074618 | 0.6215747343  | -1.3124413467 |
| C                              | 6.0  | -0.8868195188 | 0.2091593846  | -0.7173503961 |
| H                              | 1.0  | 0.4716428065  | -0.4944894645 | -2.2854528574 |
| C                              | 6.0  | 0.2240281525  | -0.3680086753 | -1.2513951856 |
| O                              | 8.0  | 3.6181712831  | 1.3016969425  | 0.0000000000  |
| TOTAL ENERGY = -626.0932148133 |      |               |               |               |

**Thiophene-S-oxide-Coordinates: T<sub>1</sub> A'' State**

1.38Å S-O Bond Length

|                                |      |               |               |               |
|--------------------------------|------|---------------|---------------|---------------|
| S                              | 16.0 | 1.7478470331  | -0.4633150175 | 0.0000000000  |
| H                              | 1.0  | -1.7387392753 | 0.0666345902  | -1.2971793947 |
| C                              | 6.0  | -0.8740735465 | -0.0915577456 | -0.6817814002 |
| H                              | 1.0  | 0.6916251199  | -0.3483649662 | -2.2726089754 |
| C                              | 6.0  | 0.4431659222  | -0.3619487896 | -1.2293745879 |
| O                              | 8.0  | 2.5455589597  | 0.6627647678  | 0.0000000000  |
| TOTAL ENERGY = -626.1206762349 |      |               |               |               |

1.48Å S-O Bond Length

|                |      |                 |               |               |
|----------------|------|-----------------|---------------|---------------|
| S              | 16.0 | 1.7312903933    | -0.4903135819 | 0.0000000000  |
| H              | 1.0  | -1.7260131788   | 0.1051219487  | -1.2982231751 |
| C              | 6.0  | -0.8673283820   | -0.0773953997 | -0.6816353886 |
| H              | 1.0  | 0.6999792954    | -0.3651426844 | -2.2695638143 |
| C              | 6.0  | 0.4411625120    | -0.3866880402 | -1.2296686730 |
| O              | 8.0  | 2.5688824726    | 0.7298665315  | 0.0000000000  |
| TOTAL ENERGY = |      | -626.1397651783 |               |               |

1.52Å S-O Bond Length

|                |      |               |               |               |
|----------------|------|---------------|---------------|---------------|
| S              | 16.0 | 1.7248035427  | -0.5013891036 | 0.0000000000  |
| H              | 1.0  | -1.7213721674 | 0.1183294608  | -1.2985171112 |
| C              | 6.0  | -0.8648218954 | -0.0722307846 | -0.6815452675 |
| H              | 1.0  | 0.7026084500  | -0.3720805067 | -2.2685592940 |
| C              | 6.0  | 0.4402738157  | -0.3951914672 | -1.2298320969 |
| O              | 8.0  | 2.5785053442  | 0.7562250005  | 0.0000000000  |
| TOTAL ENERGY = |      | -626.1406751  |               |               |

|      |    |            |            |          |
|------|----|------------|------------|----------|
| MODE | 1  | FREQUENCY= | 0.00002    | (CM**-1) |
| MODE | 2  | FREQUENCY= | 0.00001    | (CM**-1) |
| MODE | 3  | FREQUENCY= | 0.00000    | (CM**-1) |
| MODE | 4  | FREQUENCY= | 0.00000    | (CM**-1) |
| MODE | 5  | FREQUENCY= | 0.00001    | (CM**-1) |
| MODE | 6  | FREQUENCY= | 0.00001    | (CM**-1) |
| MODE | 7  | FREQUENCY= | 136.16415  | (CM**-1) |
| MODE | 8  | FREQUENCY= | 281.34452  | (CM**-1) |
| MODE | 9  | FREQUENCY= | 354.16504  | (CM**-1) |
| MODE | 10 | FREQUENCY= | 454.67991  | (CM**-1) |
| MODE | 11 | FREQUENCY= | 505.13516  | (CM**-1) |
| MODE | 12 | FREQUENCY= | 539.94795  | (CM**-1) |
| MODE | 13 | FREQUENCY= | 617.06898  | (CM**-1) |
| MODE | 14 | FREQUENCY= | 713.41458  | (CM**-1) |
| MODE | 15 | FREQUENCY= | 720.78892  | (CM**-1) |
| MODE | 16 | FREQUENCY= | 807.65752  | (CM**-1) |
| MODE | 17 | FREQUENCY= | 884.47176  | (CM**-1) |
| MODE | 18 | FREQUENCY= | 898.84466  | (CM**-1) |
| MODE | 19 | FREQUENCY= | 969.99649  | (CM**-1) |
| MODE | 20 | FREQUENCY= | 1076.39744 | (CM**-1) |
| MODE | 21 | FREQUENCY= | 1108.98026 | (CM**-1) |
| MODE | 22 | FREQUENCY= | 1202.20696 | (CM**-1) |
| MODE | 23 | FREQUENCY= | 1350.52665 | (CM**-1) |
| MODE | 24 | FREQUENCY= | 1430.21602 | (CM**-1) |
| MODE | 25 | FREQUENCY= | 1452.39721 | (CM**-1) |
| MODE | 26 | FREQUENCY= | 1642.11179 | (CM**-1) |
| MODE | 27 | FREQUENCY= | 3412.33533 | (CM**-1) |
| MODE | 28 | FREQUENCY= | 3429.02678 | (CM**-1) |
| MODE | 29 | FREQUENCY= | 3447.03388 | (CM**-1) |

MODE 30 FREQUENCY=3450.78202 (CM\*\*-1)

1.60Å S-O Bond Length

|                |      |                 |               |               |
|----------------|------|-----------------|---------------|---------------|
| S              | 16.0 | 1.7116322853    | -0.5238832505 | 0.0000000000  |
| H              | 1.0  | -1.7120387263   | 0.1439757296  | -1.2990518142 |
| C              | 6.0  | -0.8598399250   | -0.0622575729 | -0.6813985037 |
| H              | 1.0  | 0.7075849679    | -0.3868376533 | -2.2663538831 |
| C              | 6.0  | 0.4388012428    | -0.4108333420 | -1.2297121097 |
| O              | 8.0  | 2.5977641554    | 0.8083218048  | 0.0000000000  |
| TOTAL ENERGY = |      | -626.1354612465 |               |               |

1.70Å S-O Bond Length

|                |      |                 |               |               |
|----------------|------|-----------------|---------------|---------------|
| S              | 16.0 | 1.6952116952    | -0.5536530144 | 0.0000000000  |
| H              | 1.0  | -1.6998858208   | 0.1718712742  | -1.3002922880 |
| C              | 6.0  | -0.8528779384   | -0.0499520854 | -0.6812419240 |
| H              | 1.0  | 0.7124930039    | -0.4060719598 | -2.2638490540 |
| C              | 6.0  | 0.4378551501    | -0.4274339147 | -1.2291327522 |
| O              | 8.0  | 2.6194104114    | 0.8731815006  | 0.0000000000  |
| TOTAL ENERGY = |      | -626.1213302085 |               |               |

1.80Å S-O Bond Length

|                |      |                 |               |               |
|----------------|------|-----------------|---------------|---------------|
| S              | 16.0 | 1.6781925801    | -0.5910684389 | 0.0000000000  |
| H              | 1.0  | -1.6781705303   | 0.2087492612  | -1.3017985711 |
| C              | 6.0  | -0.8372564348   | -0.0318758682 | -0.6817605260 |
| H              | 1.0  | 0.7209728736    | -0.4304106200 | -2.2612594540 |
| C              | 6.0  | 0.4417634442    | -0.4430394430 | -1.2280212148 |
| O              | 8.0  | 2.6203205959    | 0.9426834324  | 0.0000000000  |
| TOTAL ENERGY = |      | -626.1041476714 |               |               |

1.90Å S-O Bond Length

|                |      |                 |               |               |
|----------------|------|-----------------|---------------|---------------|
| S              | 16.0 | 1.6491480895    | -0.7015412000 | 0.0000000000  |
| H              | 1.0  | -1.5804922918   | 0.2511361620  | -1.3121753444 |
| C              | 6.0  | -0.7247660047   | 0.0049805565  | -0.7137092101 |
| H              | 1.0  | 0.7477101980    | -0.4814698124 | -2.2789079445 |
| C              | 6.0  | 0.4751609934    | -0.3863937867 | -1.2484466601 |
| O              | 8.0  | 2.4437971116    | 1.0243014729  | 0.0000000000  |
| TOTAL ENERGY = |      | -626.1102912111 |               |               |

2.00Å S-O Bond Length

|                |      |                 |               |               |
|----------------|------|-----------------|---------------|---------------|
| S              | 16.0 | 1.6392211541    | -0.7220346276 | 0.0000000000  |
| H              | 1.0  | -1.5890830317   | 0.2514155875  | -1.3132118796 |
| C              | 6.0  | -0.7354484983   | -0.0045058271 | -0.7156085950 |
| H              | 1.0  | 0.7334940447    | -0.4760945933 | -2.2803797910 |
| C              | 6.0  | 0.4620239852    | -0.3886518089 | -1.2486462522 |
| O              | 8.0  | 2.5022546725    | 1.0821752123  | 0.0000000000  |
| TOTAL ENERGY = |      | -626.1199712671 |               |               |

### 2.10Å S-O Bond Length

|                |      |                 |               |               |
|----------------|------|-----------------|---------------|---------------|
| S              | 16.0 | 1.6270532638    | -0.7302100086 | 0.0000000000  |
| H              | 1.0  | -1.6101246176   | 0.2329744435  | -1.3128315515 |
| C              | 6.0  | -0.7555644235   | -0.0224495211 | -0.7160884520 |
| H              | 1.0  | 0.7131759217    | -0.4755078784 | -2.2825754082 |
| C              | 6.0  | 0.4432594087    | -0.3941441392 | -1.2496219430 |
| O              | 8.0  | 2.5901283384    | 1.1359321084  | 0.0000000000  |
| TOTAL ENERGY = |      | -626.1307341192 |               |               |

### 2.30Å S-O Bond Length

|                |      |                 |               |               |
|----------------|------|-----------------|---------------|---------------|
| S              | 16.0 | 1.6048048479    | -0.7734623012 | 0.0000000000  |
| H              | 1.0  | -1.6210787726   | 0.2411766726  | -1.3125034726 |
| C              | 6.0  | -0.7697270319   | -0.0269297564 | -0.7164786672 |
| H              | 1.0  | 0.6905947673    | -0.4929814621 | -2.2837252037 |
| C              | 6.0  | 0.4238116429    | -0.4105044864 | -1.2498992238 |
| O              | 8.0  | 2.6892581452    | 1.2548278767  | 0.0000000000  |
| TOTAL ENERGY = |      | -626.1491282693 |               |               |

### 2.50Å S-O Bond Length

|                |      |                 |               |               |
|----------------|------|-----------------|---------------|---------------|
| S              | 16.0 | 1.5850607934    | -0.8331531908 | 0.0000000000  |
| H              | 1.0  | -1.6121515820   | 0.2806988533  | -1.3135279355 |
| C              | 6.0  | -0.7700099054   | -0.0130477815 | -0.7163811958 |
| H              | 1.0  | 0.6747618566    | -0.5215679183 | -2.2843887532 |
| C              | 6.0  | 0.4119170652    | -0.4291833058 | -1.2502065130 |
| O              | 8.0  | 2.7478665796    | 1.3799628711  | 0.0000000000  |
| TOTAL ENERGY = |      | -626.1627648632 |               |               |

### Thiophene-S-oxide-Coordinates: T<sub>2</sub> A' State

#### 1.36Å S-O Bond Length

|                |      |                 |               |               |
|----------------|------|-----------------|---------------|---------------|
| S              | 16.0 | 1.6423688302    | -0.3141236056 | 0.0000000000  |
| H              | 1.0  | -1.6754300357   | -0.0309144303 | -1.3038026024 |
| C              | 6.0  | -0.7993819353   | -0.2177351393 | -0.7131725655 |
| H              | 1.0  | 0.7555808953    | -0.3959576619 | -2.2933540795 |
| C              | 6.0  | 0.4541295077    | -0.4069415320 | -1.2674683963 |
| O              | 8.0  | 2.6118369217    | 0.6396749162  | 0.0000000000  |
| TOTAL ENERGY = |      | -626.0698374934 |               |               |

#### 1.48Å S-O Bond Length

|                |      |                 |               |               |
|----------------|------|-----------------|---------------|---------------|
| S              | 16.0 | 1.6293971968    | -0.3432109857 | 0.0000000000  |
| H              | 1.0  | -1.6853652611   | -0.0320847282 | -1.3063722688 |
| C              | 6.0  | -0.8102461574   | -0.2141565696 | -0.7131808085 |
| H              | 1.0  | 0.7461594211    | -0.4092075744 | -2.2895676029 |
| C              | 6.0  | 0.4413786191    | -0.4131516477 | -1.2649728424 |
| O              | 8.0  | 2.6756390288    | 0.7035831817  | 0.0000000000  |
| TOTAL ENERGY = |      | -626.0970885578 |               |               |

### 1.60Å S-O Bond Length

|                |      |                 |               |               |
|----------------|------|-----------------|---------------|---------------|
| S              | 16.0 | 1.6144642928    | -0.4220765755 | 0.0000000000  |
| H              | 1.0  | -1.6889937102   | 0.0559617962  | -1.3097877205 |
| C              | 6.0  | -0.8192437276   | -0.1379890322 | -0.7126469917 |
| H              | 1.0  | 0.7240568532    | -0.4245752740 | -2.2830961310 |
| C              | 6.0  | 0.4219130090    | -0.3904135499 | -1.2582187267 |
| O              | 8.0  | 2.7514391992    | 0.7036623221  | 0.0000000000  |
| TOTAL ENERGY = |      | -626.0995828952 |               |               |

### 1.70Å S-O Bond Length

|                |      |                 |               |               |
|----------------|------|-----------------|---------------|---------------|
| S              | 16.0 | 1.6279480683    | -0.5217828385 | 0.0000000000  |
| H              | 1.0  | -1.6751730782   | 0.0791687527  | -1.3102169725 |
| C              | 6.0  | -0.8012878952   | -0.0940440240 | -0.7127863068 |
| H              | 1.0  | 0.7208687059    | -0.4503108834 | -2.2815419195 |
| C              | 6.0  | 0.4306969040    | -0.3729822036 | -1.2551096727 |
| O              | 8.0  | 2.6830243698    | 0.8111890285  | 0.0000000000  |
| TOTAL ENERGY = |      | -626.1017079848 |               |               |

### 1.80Å S-O Bond Length

|                |      |                 |               |               |
|----------------|------|-----------------|---------------|---------------|
| S              | 16.0 | 1.6238009200    | -0.5659396882 | 0.0000000000  |
| H              | 1.0  | -1.6737167765   | 0.0980991327  | -1.3123221822 |
| C              | 6.0  | -0.8013179688   | -0.0832165649 | -0.7149946955 |
| H              | 1.0  | 0.7123155225    | -0.4434778396 | -2.2799916045 |
| C              | 6.0  | 0.4257001064    | -0.3710682025 | -1.2518149801 |
| O              | 8.0  | 2.6997511069    | 0.8770887928  | 0.0000000000  |
| TOTAL ENERGY = |      | -626.1078137554 |               |               |

### 1.90Å S-O Bond Length

|                |      |                 |               |               |
|----------------|------|-----------------|---------------|---------------|
| S              | 16.0 | 1.6141523859    | -0.5876851929 | 0.0000000000  |
| H              | 1.0  | -1.6849739052   | 0.0970977384  | -1.3136066277 |
| C              | 6.0  | -0.8133840324   | -0.0892301498 | -0.7164068816 |
| H              | 1.0  | 0.6962466072    | -0.4333852118 | -2.2803108882 |
| C              | 6.0  | 0.4123936703    | -0.3704422629 | -1.2504393360 |
| O              | 8.0  | 2.7605519079    | 0.9274940493  | 0.0000000000  |
| TOTAL ENERGY = |      | -626.1153446231 |               |               |

### 2.00Å S-O Bond Length

|                |      |                 |               |               |
|----------------|------|-----------------|---------------|---------------|
| S              | 16.0 | 1.5976566825    | -0.5670479680 | 0.0000000000  |
| H              | 1.0  | -1.7267383953   | 0.0374652495  | -1.3132100833 |
| C              | 6.0  | -0.8501247948   | -0.1286876846 | -0.7169977999 |
| H              | 1.0  | 0.6630306138    | -0.4155409121 | -2.2832601292 |
| C              | 6.0  | 0.3813453100    | -0.3678275416 | -1.2515148090 |
| O              | 8.0  | 2.9046899579    | 0.9467903812  | 0.0000000000  |
| TOTAL ENERGY = |      | -626.1245475289 |               |               |

### 2.10Å S-O Bond Length

|                |      |                 |               |               |
|----------------|------|-----------------|---------------|---------------|
| S              | 16.0 | 1.4813182271    | -0.0170721919 | 0.0000000000  |
| H              | 1.0  | -1.8407628066   | -0.7334065578 | -1.3140654548 |
| C              | 6.0  | -0.9679497950   | -0.5447492050 | -0.7181902595 |
| H              | 1.0  | 0.5255911476    | -0.2218213893 | -2.2870814622 |
| C              | 6.0  | 0.2541687215    | -0.2810402444 | -1.2525832591 |
| O              | 8.0  | 3.5365461259    | 0.4142493635  | 0.0000000000  |
| TOTAL ENERGY = |      | -626.1354178426 |               |               |

#### 2.20Å S-O Bond Length

|                |      |                 |               |               |
|----------------|------|-----------------|---------------|---------------|
| S              | 16.0 | 1.4639048672    | -0.0206739226 | 0.0000000000  |
| H              | 1.0  | -1.8550743774   | -0.7362676842 | -1.3137942756 |
| C              | 6.0  | -0.9823949560   | -0.5477663519 | -0.7177694002 |
| H              | 1.0  | 0.5120589972    | -0.2250210890 | -2.2860426355 |
| C              | 6.0  | 0.2405402983    | -0.2840504703 | -1.2515964078 |
| O              | 8.0  | 3.6169861146    | 0.4312565387  | 0.0000000000  |
| TOTAL ENERGY = |      | -626.1459496792 |               |               |

#### 2.30Å S-O Bond Length

|                |      |                |               |               |
|----------------|------|----------------|---------------|---------------|
| S              | 16.0 | 1.4470374117   | -0.0241878295 | 0.0000000000  |
| H              | 1.0  | -1.8696404512  | -0.7392460172 | -1.3138903944 |
| C              | 6.0  | -0.9972133865  | -0.5508940749 | -0.7174535150 |
| H              | 1.0  | 0.4979345134   | -0.2282017134 | -2.2854552923 |
| C              | 6.0  | 0.2262694310   | -0.2871344669 | -1.2510532153 |
| O              | 8.0  | 3.6979656723   | 0.4483771383  | 0.0000000000  |
| TOTAL ENERGY = |      | -626.154235727 |               |               |

#### 2.40Å S-O Bond Length

|                |      |                 |              |               |
|----------------|------|-----------------|--------------|---------------|
| S              | 16.0 | 1.4304825153    | -.0276430913 | .0000000000   |
| H              | 1.0  | -1.8845725721   | -.7423688583 | -1.3137334670 |
| C              | 6.0  | -1.0122165265   | -.5540843451 | -.7172251877  |
| H              | 1.0  | .4835283580     | -.2313476010 | -2.2851084545 |
| C              | 6.0  | .2116028410     | -.2902634704 | -1.2507980200 |
| O              | 8.0  | 3.7792730084    | .4655557284  | .0000000000   |
| TOTAL ENERGY = |      | -626.1605421607 |              |               |

#### 2.50Å S-O Bond Length

|                |      |                 |               |               |
|----------------|------|-----------------|---------------|---------------|
| S              | 16.0 | 1.4140904775    | -0.0310724289 | 0.0000000000  |
| H              | 1.0  | -1.8995413695   | -0.7455236644 | -1.3137483220 |
| C              | 6.0  | -1.0273199957   | -0.5572991465 | -0.7170810757 |
| H              | 1.0  | 0.4688659815    | -0.2345130522 | -2.2848999468 |
| C              | 6.0  | 0.1967609831    | -0.2934175060 | -1.2506804291 |
| O              | 8.0  | 3.8607052457    | 0.4827633611  | 0.0000000000  |
| TOTAL ENERGY = |      | -626.1652355464 |               |               |

#### 2.60Å S-O Bond Length

|   |      |               |               |               |
|---|------|---------------|---------------|---------------|
| S | 16.0 | 1.3980409395  | -0.0344256616 | 0.0000000000  |
| H | 1.0  | -1.9149039445 | -0.7487965005 | -1.3136792878 |

|                |     |                 |               |               |
|----------------|-----|-----------------|---------------|---------------|
| C              | 6.0 | -1.0426886539   | -0.5605825074 | -0.7169569932 |
| H              | 1.0 | 0.4536212875    | -0.2377716525 | -2.2848407469 |
| C              | 6.0 | 0.1815369114    | -0.2966379987 | -1.2505894374 |
| O              | 8.0 | 3.9425472824    | 0.5000480703  | 0.0000000000  |
| TOTAL ENERGY = |     | -626.1686761919 |               |               |

#### 2.70Å S-O Bond Length

|                |      |                 |               |               |
|----------------|------|-----------------|---------------|---------------|
| S              | 16.0 | 1.3819877137    | -0.0377836654 | 0.0000000000  |
| H              | 1.0  | -1.9301925684   | -0.7520457116 | -1.3136474918 |
| C              | 6.0  | -1.0579978380   | -0.5638468745 | -0.7168813347 |
| H              | 1.0  | 0.4383955500    | -0.2410253078 | -2.2848157416 |
| C              | 6.0  | 0.1662724088    | -0.2998729186 | -1.2505993063 |
| O              | 8.0  | 4.0243564086    | 0.5173318639  | 0.0000000000  |
| TOTAL ENERGY = |      | -626.1711634019 |               |               |

#### 2.80Å S-O Bond Length

|                |      |                 |               |               |
|----------------|------|-----------------|---------------|---------------|
| S              | 16.0 | 1.3660685424    | -0.0411147295 | 0.0000000000  |
| H              | 1.0  | -1.9455975756   | -0.7553240742 | -1.3135470002 |
| C              | 6.0  | -1.0734276693   | -0.5671376402 | -0.7168031828 |
| H              | 1.0  | 0.4230993939    | -0.2442877979 | -2.2847730017 |
| C              | 6.0  | 0.1509017378    | -0.3031282436 | -1.2505891352 |
| O              | 8.0  | 4.1062614468    | 0.5346368229  | 0.0000000000  |
| TOTAL ENERGY = |      | -626.1729406221 |               |               |

#### 2.90Å S-O Bond Length

|                |      |                 |               |               |
|----------------|------|-----------------|---------------|---------------|
| S              | 16.0 | 1.3502254287    | -0.0444294890 | 0.0000000000  |
| H              | 1.0  | -1.9610778946   | -0.7586269855 | -1.3135253649 |
| C              | 6.0  | -1.0889352058   | -0.5704466974 | -0.7167608446 |
| H              | 1.0  | 0.4077224391    | -0.2475598893 | -2.2847622105 |
| C              | 6.0  | 0.1354747462    | -0.3063930361 | -1.2506261485 |
| O              | 8.0  | 4.1882352296    | 0.5519551460  | 0.0000000000  |
| TOTAL ENERGY = |      | -626.1741968609 |               |               |

#### 3.00Å S-O Bond Length

|                |      |                 |               |               |
|----------------|------|-----------------|---------------|---------------|
| S              | 16.0 | 1.3344710810    | -0.0477269369 | 0.0000000000  |
| H              | 1.0  | -1.9766192378   | -0.7619592474 | -1.3135234868 |
| C              | 6.0  | -1.1044728003   | -0.5737626962 | -0.7167473709 |
| H              | 1.0  | 0.3921606372    | -0.2508515697 | -2.2848097977 |
| C              | 6.0  | 0.1198983042    | -0.3096869386 | -1.2506550071 |
| O              | 8.0  | 4.2703319115    | 0.5692991271  | 0.0000000000  |
| TOTAL ENERGY = |      | -626.1750752019 |               |               |

#### 3.10Å S-O Bond Length

|   |      |               |               |               |
|---|------|---------------|---------------|---------------|
| S | 16.0 | 1.3187067512  | -0.0510292131 | 0.0000000000  |
| H | 1.0  | -1.9921824759 | -0.7652896734 | -1.3134868872 |
| C | 6.0  | -1.1200408487 | -0.5770820677 | -0.7167265014 |
| H | 1.0  | 0.3766588406  | -0.2541336041 | -2.2848092213 |



|                |     |                 |               |               |
|----------------|-----|-----------------|---------------|---------------|
| C              | 6.0 | 0.1043491506    | -0.3129770582 | -1.2506866120 |
| O              | 8.0 | 4.3524484937    | 0.5866506969  | 0.0000000000  |
| TOTAL ENERGY = |     | -626.1756819644 |               |               |

### 3.20Å S-O Bond Length

|                |      |                 |               |               |
|----------------|------|-----------------|---------------|---------------|
| S              | 16.0 | 1.2874032150    | -0.0580835272 | 0.0000000000  |
| H              | 1.0  | -2.0240751755   | -0.7689375241 | -1.3135180730 |
| C              | 6.0  | -1.1517197137   | -0.5816175836 | -0.7167017489 |
| H              | 1.0  | 0.3453537847    | -0.2601904841 | -2.2848398654 |
| C              | 6.0  | 0.0730218765    | -0.3187419450 | -1.2506651063 |
| O              | 8.0  | 4.5175241800    | 0.6174299906  | 0.0000000000  |
| TOTAL ENERGY = |      | -626.1760950952 |               |               |

### **Thiophene-S-oxide-Coordinates: <sup>1</sup>A" State**

#### 1.48Å S-O Bond Length

|                |      |                 |               |               |
|----------------|------|-----------------|---------------|---------------|
| S              | 16.0 | 1.6561888376    | -0.3002565885 | 0.0000000000  |
| H              | 1.0  | -1.7590303280   | -0.1013836034 | -1.3169268787 |
| C              | 6.0  | -0.9108655883   | -0.2263771388 | -0.6736077920 |
| H              | 1.0  | 0.7232520004    | -0.5039927567 | -2.2337957855 |
| C              | 6.0  | 0.4511168243    | -0.4244059937 | -1.2008154844 |
| O              | 8.0  | 2.7706205906    | 0.6736232134  | 0.0000000000  |
| TOTAL ENERGY = |      | -626.0445753954 |               |               |

#### 1.51Å S-O Bond Length

|                |      |                 |               |               |
|----------------|------|-----------------|---------------|---------------|
| S              | 16.0 | 1.6054651894    | -0.6124315050 | 0.0000000000  |
| H              | 1.0  | -1.6445937184   | 0.3871195458  | -1.3037482705 |
| C              | 6.0  | -0.7841015998   | 0.1775523657  | -0.6981030920 |
| H              | 1.0  | 0.7349191595    | -0.3045946775 | -2.2695889510 |
| C              | 6.0  | 0.4170577321    | -0.2694237338 | -1.2496166892 |
| O              | 8.0  | 2.5725693145    | 0.5472277603  | 0.0000000000  |
| TOTAL ENERGY = |      | -626.0471348673 |               |               |

#### 1.60Å S-O Bond Length

|                |      |                 |               |               |
|----------------|------|-----------------|---------------|---------------|
| S              | 16.0 | 1.5858540739    | -0.6474666122 | 0.0000000000  |
| H              | 1.0  | -1.6030206711   | 0.4589079431  | -1.3063113270 |
| C              | 6.0  | -0.7541326299   | 0.1989836208  | -0.7040974679 |
| H              | 1.0  | 0.7067000512    | -0.4129234483 | -2.2732643706 |
| C              | 6.0  | 0.4219843594    | -0.2919734896 | -1.2503522934 |
| O              | 8.0  | 2.5577268901    | 0.6235421328  | 0.0000000000  |
| TOTAL ENERGY = |      | -626.0604208931 |               |               |

#### 1.70Å S-O Bond Length

|   |      |               |               |               |
|---|------|---------------|---------------|---------------|
| S | 16.0 | 1.5734114251  | -0.6886564780 | 0.0000000000  |
| H | 1.0  | -1.5781666098 | 0.5068304209  | -1.3060210227 |
| C | 6.0  | -0.7353074816 | 0.2157121005  | -0.7096682696 |
| H | 1.0  | 0.6798861067  | -0.4637733865 | -2.2815196909 |

|                |     |                 |               |               |
|----------------|-----|-----------------|---------------|---------------|
| C              | 6.0 | 0.4204779340    | -0.3032105292 | -1.2570293873 |
| O              | 8.0 | 2.5568590095    | 0.6980052867  | 0.0000000000  |
| TOTAL ENERGY = |     | -626.0683820406 |               |               |

#### 1.80Å S-O Bond Length

|                |      |                 |               |               |
|----------------|------|-----------------|---------------|---------------|
| S              | 16.0 | 1.5576391061    | -0.7148427145 | 0.0000000000  |
| H              | 1.0  | -1.5714777179   | 0.5259638216  | -1.3092734209 |
| C              | 6.0  | -0.7348444100   | 0.2174596390  | -0.7130159463 |
| H              | 1.0  | 0.6719238511    | -0.4645812587 | -2.2812834431 |
| C              | 6.0  | 0.4142118481    | -0.3093166516 | -1.2552365090 |
| O              | 8.0  | 2.5972539028    | 0.7545793061  | 0.0000000000  |
| TOTAL ENERGY = |      | -626.0717823754 |               |               |

#### 1.90Å S-O Bond Length

|                |      |                 |               |               |
|----------------|------|-----------------|---------------|---------------|
| S              | 16.0 | 1.5432143074    | -0.7414753624 | 0.0000000000  |
| H              | 1.0  | -1.5679226707   | 0.5416135019  | -1.3120360857 |
| C              | 6.0  | -0.7373033622   | 0.2171400967  | -0.7158857324 |
| H              | 1.0  | 0.6656193213    | -0.4565795533 | -2.2813941068 |
| C              | 6.0  | 0.4070756969    | -0.3120446658 | -1.2536758732 |
| O              | 8.0  | 2.6408312128    | 0.8094073311  | 0.0000000000  |
| TOTAL ENERGY = |      | -626.0729876633 |               |               |

#### 2.00Å S-O Bond Length

|                |      |                |               |               |
|----------------|------|----------------|---------------|---------------|
| S              | 16.0 | 1.5298925140   | -0.7699016339 | 0.0000000000  |
| H              | 1.0  | -1.5644013706  | 0.5575598998  | -1.3138380115 |
| C              | 6.0  | -0.7398104129  | 0.2174995015  | -0.7179454187 |
| H              | 1.0  | 0.6596483290   | -0.4474724528 | -2.2821214130 |
| C              | 6.0  | 0.4000611655   | -0.3136114624 | -1.2529456678 |
| O              | 8.0  | 2.6820556400   | 0.8648827957  | 0.0000000000  |
| TOTAL ENERGY = |      | -626.073479808 |               |               |

#### 2.20Å S-O Bond Length

|                |      |                 |               |               |
|----------------|------|-----------------|---------------|---------------|
| S              | 16.0 | 1.5055560665    | -0.8159704407 | 0.0000000000  |
| H              | 1.0  | -1.5720742055   | 0.5757917642  | -1.3135646600 |
| C              | 6.0  | -0.7566227239   | 0.2118831494  | -0.7187627629 |
| H              | 1.0  | 0.6373579253    | -0.4369686087 | -2.2853080989 |
| C              | 6.0  | 0.3783786943    | -0.3181146390 | -1.2535715954 |
| O              | 8.0  | 2.7922379905    | 0.9685321864  | 0.0000000000  |
| TOTAL ENERGY = |      | -626.0754986414 |               |               |

#### **Thiophene-S-oxide-Coordinates: <sup>1</sup>A' State**

##### 1.40Å S-O Bond Length

|   |      |               |               |               |
|---|------|---------------|---------------|---------------|
| S | 16.0 | 1.5931842910  | -0.4094607967 | 0.0000000000  |
| H | 1.0  | -1.6324440311 | 0.4492484982  | -1.2995772644 |
| C | 6.0  | -0.8052011858 | 0.1007608143  | -0.7106871465 |
| H | 1.0  | 0.6723757020  | -0.3796796970 | -2.3007589082 |
| C | 6.0  | 0.3616665509  | -0.3795655847 | -1.2773705055 |

|                |     |                 |              |              |
|----------------|-----|-----------------|--------------|--------------|
| O              | 8.0 | 2.5441634166    | 0.6179820014 | 0.0000000000 |
| TOTAL ENERGY = |     | -626.0632473765 |              |              |

1.50Å S-O Bond Length

|                |      |                 |               |               |
|----------------|------|-----------------|---------------|---------------|
| S              | 16.0 | 1.5786104562    | -0.4416816916 | 0.0000000000  |
| H              | 1.0  | -1.6575861754   | 0.4043912612  | -1.3031005411 |
| C              | 6.0  | -0.8190864113   | 0.0927797804  | -0.7101833719 |
| H              | 1.0  | 0.6697198186    | -0.3886821947 | -2.2949403671 |
| C              | 6.0  | 0.3632411027    | -0.3529570652 | -1.2716186342 |
| O              | 8.0  | 2.5952698580    | 0.6612252224  | 0.0000000000  |
| TOTAL ENERGY = |      | -626.0801421652 |               |               |

1.60Å S-O Bond Length

|                |      |                 |               |               |
|----------------|------|-----------------|---------------|---------------|
| S              | 16.0 | 1.5651513689    | -0.4827903554 | 0.0000000000  |
| H              | 1.0  | -1.6776602569   | 0.3576858448  | -1.3068109629 |
| C              | 6.0  | -0.8277074826   | 0.0881932966  | -0.7102898594 |
| H              | 1.0  | 0.6673815643    | -0.3996301902 | -2.2870645972 |
| C              | 6.0  | 0.3700588020    | -0.3216024161 | -1.2636386019 |
| O              | 8.0  | 2.6277033781    | 0.7104972852  | 0.0000000000  |
| TOTAL ENERGY = |      | -626.0831550864 |               |               |

1.70Å S-O Bond Length

|                |      |                 |               |               |
|----------------|------|-----------------|---------------|---------------|
| S              | 16.0 | 1.5589964510    | -0.5359214592 | 0.0000000000  |
| H              | 1.0  | -1.6854191910   | 0.3426649447  | -1.3084472384 |
| C              | 6.0  | -0.8283884168   | 0.0967115108  | -0.7122426584 |
| H              | 1.0  | 0.6576176541    | -0.4102344519 | -2.2854436035 |
| C              | 6.0  | 0.3723933839    | -0.3010643618 | -1.2611643667 |
| O              | 8.0  | 2.6397333202    | 0.7763314965  | 0.0000000000  |
| TOTAL ENERGY = |      | -626.0824331116 |               |               |

1.80Å S-O Bond Length

|                |      |                |               |               |
|----------------|------|----------------|---------------|---------------|
| S              | 16.0 | 1.5485730095   | -0.5728603456 | 0.0000000000  |
| H              | 1.0  | -1.6857538452  | 0.3509263682  | -1.3108922239 |
| C              | 6.0  | -0.8290659763  | 0.1036949509  | -0.7148332731 |
| H              | 1.0  | 0.6495332169   | -0.4091359402 | -2.2831877433 |
| C              | 6.0  | 0.3683637649   | -0.2994965410 | -1.2575357079 |
| O              | 8.0  | 2.6686926096   | 0.8361577816  | 0.0000000000  |
| TOTAL ENERGY = |      | -626.081331782 |               |               |

1.90Å S-O Bond Length

|                |      |                 |               |               |
|----------------|------|-----------------|---------------|---------------|
| S              | 16.0 | 1.5369080731    | -0.6017803970 | 0.0000000000  |
| H              | 1.0  | -1.6889226819   | 0.3588567682  | -1.3130229884 |
| C              | 6.0  | -0.8340092752   | 0.1048948918  | -0.7172217487 |
| H              | 1.0  | 0.6403968853    | -0.4020262211 | -2.2822498438 |
| C              | 6.0  | 0.3602848251    | -0.2995766551 | -1.2552846785 |
| O              | 8.0  | 2.7130997868    | 0.8903901873  | 0.0000000000  |
| TOTAL ENERGY = |      | -626.0797112881 |               |               |

2.00Å S-O Bond Length

|                |      |                 |               |               |
|----------------|------|-----------------|---------------|---------------|
| S              | 16.0 | 1.5260313973    | -0.6265555117 | 0.0000000000  |
| H              | 1.0  | -1.6968107899   | 0.3612067018  | -1.3139997874 |
| C              | 6.0  | -0.8426834380   | 0.1021689101  | -0.7190975160 |
| H              | 1.0  | 0.6274713755    | -0.3933569886 | -2.2838764964 |
| C              | 6.0  | 0.3486715740    | -0.2986111974 | -1.2553559132 |
| O              | 8.0  | 2.7679047680    | 0.9411659339  | 0.0000000000  |
| TOTAL ENERGY = |      | -626.0787569968 |               |               |

**Selenophene-Se-oxide-Coordinates: S<sub>0</sub> A' State**

1.65Å S-O Bond Length

|                |      |                  |              |               |
|----------------|------|------------------|--------------|---------------|
| C              | 6.0  | -.8434234720     | .0604081850  | -.7375828784  |
| SE             | 34.0 | 1.7071384915     | -.6184554663 | .0000000000   |
| C              | 6.0  | .3470106986      | -.1879992344 | -1.3095936583 |
| H              | 1.0  | .5603507407      | -.2417836683 | -2.3588677665 |
| O              | 8.0  | 2.9041269549     | .5285611667  | .0000000000   |
| H              | 1.0  | -1.7410706905    | .2528218675  | -1.2968645279 |
| TOTAL ENERGY = |      | -2628.2376050816 |              |               |

|      |    |            |            |          |
|------|----|------------|------------|----------|
| MODE | 1  | FREQUENCY= | 0.00003    | (CM**-1) |
| MODE | 2  | FREQUENCY= | 0.00002    | (CM**-1) |
| MODE | 3  | FREQUENCY= | 0.00001    | (CM**-1) |
| MODE | 4  | FREQUENCY= | 0.00000    | (CM**-1) |
| MODE | 5  | FREQUENCY= | 0.00000    | (CM**-1) |
| MODE | 6  | FREQUENCY= | 0.00001    | (CM**-1) |
| MODE | 7  | FREQUENCY= | 166.80894  | (CM**-1) |
| MODE | 8  | FREQUENCY= | 217.42142  | (CM**-1) |
| MODE | 9  | FREQUENCY= | 401.64689  | (CM**-1) |
| MODE | 10 | FREQUENCY= | 449.18379  | (CM**-1) |
| MODE | 11 | FREQUENCY= | 481.51128  | (CM**-1) |
| MODE | 12 | FREQUENCY= | 570.38526  | (CM**-1) |
| MODE | 13 | FREQUENCY= | 702.70848  | (CM**-1) |
| MODE | 14 | FREQUENCY= | 706.24163  | (CM**-1) |
| MODE | 15 | FREQUENCY= | 746.16736  | (CM**-1) |
| MODE | 16 | FREQUENCY= | 873.32240  | (CM**-1) |
| MODE | 17 | FREQUENCY= | 882.86263  | (CM**-1) |
| MODE | 18 | FREQUENCY= | 938.95257  | (CM**-1) |
| MODE | 19 | FREQUENCY= | 941.07312  | (CM**-1) |
| MODE | 20 | FREQUENCY= | 1035.89102 | (CM**-1) |
| MODE | 21 | FREQUENCY= | 1193.57354 | (CM**-1) |
| MODE | 22 | FREQUENCY= | 1194.83270 | (CM**-1) |
| MODE | 23 | FREQUENCY= | 1391.51387 | (CM**-1) |
| MODE | 24 | FREQUENCY= | 1476.53265 | (CM**-1) |
| MODE | 25 | FREQUENCY= | 1638.02456 | (CM**-1) |

MODE 26 FREQUENCY=1709.64646 (CM\*\*-1)  
MODE 27 FREQUENCY=3385.71367 (CM\*\*-1)  
MODE 28 FREQUENCY=3399.21962 (CM\*\*-1)  
MODE 29 FREQUENCY=3441.30481 (CM\*\*-1)  
MODE 30 FREQUENCY=3442.92396 (CM\*\*-1)

**Selenophene-Se-oxide-Coordinates: S<sub>1</sub> A' State**

1.65Å S-O Bond Length

|                |      |                  |               |               |
|----------------|------|------------------|---------------|---------------|
| C              | 6.0  | -0.7874425669    | 0.1224620607  | -0.7096041026 |
| SE             | 34.0 | 1.6899101783     | -0.5949009850 | 0.0000000000  |
| C              | 6.0  | 0.3550200202     | -0.3521004616 | -1.3266614167 |
| H              | 1.0  | 0.6189147228     | -0.3594383524 | -2.3625090790 |
| O              | 8.0  | 2.8751933754     | 0.5529682342  | 0.0000000000  |
| H              | 1.0  | -1.6316840177    | 0.4591410501  | -1.2820545552 |
| TOTAL ENERGY = |      | -2628.0946614705 |               |               |

**Selenophene-Se-oxide-Coordinates: S<sub>2</sub> A'' State**

1.65Å S-O Bond Length

|                |      |                  |               |               |
|----------------|------|------------------|---------------|---------------|
| C              | 6.0  | -0.7605215373    | 0.1894422587  | -0.7058506210 |
| SE             | 34.0 | 1.7185915034     | -0.6708622910 | 0.0000000000  |
| C              | 6.0  | 0.3971077120     | -0.2665149702 | -1.3114675173 |
| H              | 1.0  | 0.6366200072     | -0.3712137707 | -2.3477074431 |
| O              | 8.0  | 2.6258476435     | 0.7073199525  | 0.0000000000  |
| H              | 1.0  | -1.6295733067    | 0.4412204998  | -1.2846640426 |
| TOTAL ENERGY = |      | -2628.0726859380 |               |               |

**Selenophene-Se-oxide-Coordinates: T<sub>1</sub> A'' State**

1.65Å S-O Bond Length

|                |      |                  |               |               |
|----------------|------|------------------|---------------|---------------|
| C              | 6.0  | -0.8825568173    | 0.1717108447  | -0.6817666193 |
| SE             | 34.0 | 1.7416653623     | -0.6426607443 | 0.0000000000  |
| C              | 6.0  | 0.3454210229     | -0.3159203077 | -1.2867772778 |
| H              | 1.0  | 0.5724977491     | -0.2595512578 | -2.3331801982 |
| O              | 8.0  | 2.7821301692     | 0.6516037244  | 0.0000000000  |
| H              | 1.0  | -1.7184869543    | 0.4867383113  | -1.2774160924 |
| TOTAL ENERGY = |      | -2628.1529534262 |               |               |

MODE 1 FREQUENCY= 0.00004 (CM\*\*-1)  
MODE 2 FREQUENCY= 0.00001 (CM\*\*-1)  
MODE 3 FREQUENCY= 0.00001 (CM\*\*-1)  
MODE 4 FREQUENCY= 0.00000 (CM\*\*-1)  
MODE 5 FREQUENCY= 0.00001 (CM\*\*-1)  
MODE 6 FREQUENCY= 0.00001 (CM\*\*-1)  
MODE 7 FREQUENCY= 133.83622 (CM\*\*-1)  
MODE 8 FREQUENCY= 225.15098 (CM\*\*-1)  
MODE 9 FREQUENCY= 282.11014 (CM\*\*-1)  
MODE 10 FREQUENCY= 440.89438 (CM\*\*-1)  
MODE 11 FREQUENCY= 444.47409 (CM\*\*-1)

|      |    |            |            |          |
|------|----|------------|------------|----------|
| MODE | 12 | FREQUENCY= | 452.27096  | (CM**-1) |
| MODE | 13 | FREQUENCY= | 507.43525  | (CM**-1) |
| MODE | 14 | FREQUENCY= | 588.89532  | (CM**-1) |
| MODE | 15 | FREQUENCY= | 725.46632  | (CM**-1) |
| MODE | 16 | FREQUENCY= | 736.08216  | (CM**-1) |
| MODE | 17 | FREQUENCY= | 855.11303  | (CM**-1) |
| MODE | 18 | FREQUENCY= | 873.41969  | (CM**-1) |
| MODE | 19 | FREQUENCY= | 905.75649  | (CM**-1) |
| MODE | 20 | FREQUENCY= | 959.21042  | (CM**-1) |
| MODE | 21 | FREQUENCY= | 1085.87215 | (CM**-1) |
| MODE | 22 | FREQUENCY= | 1210.67073 | (CM**-1) |
| MODE | 23 | FREQUENCY= | 1321.32944 | (CM**-1) |
| MODE | 24 | FREQUENCY= | 1393.38761 | (CM**-1) |
| MODE | 25 | FREQUENCY= | 1460.29510 | (CM**-1) |
| MODE | 26 | FREQUENCY= | 1646.89747 | (CM**-1) |
| MODE | 27 | FREQUENCY= | 3396.70645 | (CM**-1) |
| MODE | 28 | FREQUENCY= | 3413.85901 | (CM**-1) |
| MODE | 29 | FREQUENCY= | 3435.90279 | (CM**-1) |
| MODE | 30 | FREQUENCY= | 3439.09351 | (CM**-1) |

#### **Selenophene-Se-oxide-Coordinates: T<sub>2</sub> A' State**

1.65Å S-O Bond Length

|                |      |                 |               |                 |
|----------------|------|-----------------|---------------|-----------------|
| C              | 6.0  | -0.8262212761   | 0.0590556316  | -0.7137100424   |
| SE             | 34.0 | 1.6797144018    | -0.5480288509 | 0.0000000000    |
| C              | 6.0  | 0.3390500976    | -0.3531029260 | -1.3219753251   |
| H              | 1.0  | 0.5937268646    | -0.3503333078 | -2.3607109264   |
| O              | 8.0  | 3.0143421125    | 0.4221612723  | 0.0000000000    |
| H              | 1.0  | -1.6717734156   | 0.3953846855  | -1.2843397347 - |
| TOTAL ENERGY = |      | 2628.1091017991 |               |                 |

#### **Dibenzothiophene-S-oxide-Coordinates: S<sub>0</sub> A' State**

|                |      |                 |              |              |
|----------------|------|-----------------|--------------|--------------|
| S              | 16.0 | 1.6213256014    | -.4184904228 | .0000000000  |
| C              | 6.0  | -2.0024416587   | .1148183371  | 1.6029682735 |
| C              | 6.0  | -.9467240768    | -.0257524420 | .7367079883  |
| C              | 6.0  | .5970059706     | -.1462881257 | 2.6108556731 |
| C              | 6.0  | .3543561662     | -.1727227364 | 1.2565125096 |
| O              | 8.0  | 2.6480785308    | .6869948846  | .0000000000  |
| C              | 6.0  | -1.7634090579   | .1355060410  | 2.9824039317 |
| C              | 6.0  | -.4872979773    | .0155819059  | 3.4818117291 |
| H              | 1.0  | 1.5966982025    | -.2425519677 | 2.9939922912 |
| H              | 1.0  | -.3182926580    | .0449790147  | 4.5427968650 |
| H              | 1.0  | -2.5919001382   | .2536715453  | 3.6572896537 |
| H              | 1.0  | -3.0073767437   | .2200270728  | 1.2357728641 |
| TOTAL ENERGY = |      | -931.5392139852 |              |              |

|      |   |            |         |          |
|------|---|------------|---------|----------|
| MODE | 1 | FREQUENCY= | 0.00003 | (CM**-1) |
|------|---|------------|---------|----------|

|      |    |            |            |          |
|------|----|------------|------------|----------|
| MODE | 2  | FREQUENCY= | 0.00001    | (CM**-1) |
| MODE | 3  | FREQUENCY= | 0.00000    | (CM**-1) |
| MODE | 4  | FREQUENCY= | 0.00000    | (CM**-1) |
| MODE | 5  | FREQUENCY= | 0.00001    | (CM**-1) |
| MODE | 6  | FREQUENCY= | 0.00001    | (CM**-1) |
| MODE | 7  | FREQUENCY= | 84.42347   | (CM**-1) |
| MODE | 8  | FREQUENCY= | 112.24822  | (CM**-1) |
| MODE | 9  | FREQUENCY= | 117.95918  | (CM**-1) |
| MODE | 10 | FREQUENCY= | 188.62551  | (CM**-1) |
| MODE | 11 | FREQUENCY= | 218.07551  | (CM**-1) |
| MODE | 12 | FREQUENCY= | 292.18302  | (CM**-1) |
| MODE | 13 | FREQUENCY= | 370.33019  | (CM**-1) |
| MODE | 14 | FREQUENCY= | 419.88229  | (CM**-1) |
| MODE | 15 | FREQUENCY= | 423.28944  | (CM**-1) |
| MODE | 16 | FREQUENCY= | 449.50397  | (CM**-1) |
| MODE | 17 | FREQUENCY= | 478.69357  | (CM**-1) |
| MODE | 18 | FREQUENCY= | 505.83165  | (CM**-1) |
| MODE | 19 | FREQUENCY= | 526.76065  | (CM**-1) |
| MODE | 20 | FREQUENCY= | 569.13355  | (CM**-1) |
| MODE | 21 | FREQUENCY= | 613.08384  | (CM**-1) |
| MODE | 22 | FREQUENCY= | 671.17462  | (CM**-1) |
| MODE | 23 | FREQUENCY= | 740.11754  | (CM**-1) |
| MODE | 24 | FREQUENCY= | 753.60889  | (CM**-1) |
| MODE | 25 | FREQUENCY= | 755.74085  | (CM**-1) |
| MODE | 26 | FREQUENCY= | 772.30827  | (CM**-1) |
| MODE | 27 | FREQUENCY= | 830.41832  | (CM**-1) |
| MODE | 28 | FREQUENCY= | 845.87552  | (CM**-1) |
| MODE | 29 | FREQUENCY= | 861.18093  | (CM**-1) |
| MODE | 30 | FREQUENCY= | 865.08608  | (CM**-1) |
| MODE | 31 | FREQUENCY= | 908.61929  | (CM**-1) |
| MODE | 32 | FREQUENCY= | 982.89547  | (CM**-1) |
| MODE | 33 | FREQUENCY= | 983.43409  | (CM**-1) |
| MODE | 34 | FREQUENCY= | 1053.05336 | (CM**-1) |
| MODE | 35 | FREQUENCY= | 1056.94397 | (CM**-1) |
| MODE | 36 | FREQUENCY= | 1100.14521 | (CM**-1) |
| MODE | 37 | FREQUENCY= | 1107.06196 | (CM**-1) |
| MODE | 38 | FREQUENCY= | 1118.08651 | (CM**-1) |
| MODE | 39 | FREQUENCY= | 1119.54713 | (CM**-1) |
| MODE | 40 | FREQUENCY= | 1141.82459 | (CM**-1) |
| MODE | 41 | FREQUENCY= | 1142.91740 | (CM**-1) |
| MODE | 42 | FREQUENCY= | 1176.83242 | (CM**-1) |
| MODE | 43 | FREQUENCY= | 1178.03530 | (CM**-1) |
| MODE | 44 | FREQUENCY= | 1229.04273 | (CM**-1) |
| MODE | 45 | FREQUENCY= | 1234.34962 | (CM**-1) |
| MODE | 46 | FREQUENCY= | 1307.46732 | (CM**-1) |
| MODE | 47 | FREQUENCY= | 1321.31263 | (CM**-1) |
| MODE | 48 | FREQUENCY= | 1384.63098 | (CM**-1) |

|      |    |                      |          |
|------|----|----------------------|----------|
| MODE | 49 | FREQUENCY=1414.81177 | (CM**-1) |
| MODE | 50 | FREQUENCY=1438.73731 | (CM**-1) |
| MODE | 51 | FREQUENCY=1584.33234 | (CM**-1) |
| MODE | 52 | FREQUENCY=1597.70844 | (CM**-1) |
| MODE | 53 | FREQUENCY=1626.43717 | (CM**-1) |
| MODE | 54 | FREQUENCY=1627.13222 | (CM**-1) |
| MODE | 55 | FREQUENCY=1773.10265 | (CM**-1) |
| MODE | 56 | FREQUENCY=1774.67038 | (CM**-1) |
| MODE | 57 | FREQUENCY=1787.22994 | (CM**-1) |
| MODE | 58 | FREQUENCY=1788.07865 | (CM**-1) |
| MODE | 59 | FREQUENCY=3351.93548 | (CM**-1) |
| MODE | 60 | FREQUENCY=3352.05913 | (CM**-1) |
| MODE | 61 | FREQUENCY=3368.41493 | (CM**-1) |
| MODE | 62 | FREQUENCY=3368.91712 | (CM**-1) |
| MODE | 63 | FREQUENCY=3379.87298 | (CM**-1) |
| MODE | 64 | FREQUENCY=3382.50052 | (CM**-1) |
| MODE | 65 | FREQUENCY=3396.45308 | (CM**-1) |
| MODE | 66 | FREQUENCY=3401.51924 | (CM**-1) |

**Dibenzothiophene-S-oxide-Coordinates: T<sub>1</sub> A'' State**

|                |      |                 |               |              |
|----------------|------|-----------------|---------------|--------------|
| S              | 16.0 | 1.6662437036    | -0.3889254683 | 0.0000000000 |
| C              | 6.0  | -2.0357347178   | 0.1956695537  | 1.6220945824 |
| C              | 6.0  | -0.9392164449   | 0.0116305201  | 0.6895817346 |
| C              | 6.0  | 0.6085812150    | -0.2545590941 | 2.5742771252 |
| C              | 6.0  | 0.3867978894    | -0.2151971525 | 1.2502918697 |
| O              | 8.0  | 2.5920672943    | 0.8023629892  | 0.0000000000 |
| C              | 6.0  | -1.8020144328   | 0.1525380503  | 2.9453416371 |
| C              | 6.0  | -0.4853602502   | -0.0740022071 | 3.4701481845 |
| H              | 1.0  | 1.5974940372    | -0.4118833497 | 2.9666691866 |
| H              | 1.0  | -0.3263841784   | -0.1061104733 | 4.5304191206 |
| H              | 1.0  | -2.6127441245   | 0.2905528845  | 3.6379601334 |
| H              | 1.0  | -3.0277392625   | 0.3700931247  | 1.2477906924 |
| TOTAL ENERGY = |      | -931.4166929194 |               |              |

**Dibenzothiophene-S-oxide-Coordinates: T<sub>2</sub> A' State**

|   |      |               |               |              |
|---|------|---------------|---------------|--------------|
| S | 16.0 | 1.5899328245  | -0.3946139150 | 0.0000000000 |
| C | 6.0  | -2.0147001611 | 0.1132171356  | 1.6003613503 |
| C | 6.0  | -0.9843867546 | -0.0187108718 | 0.7374799902 |
| C | 6.0  | 0.6088886506  | -0.1393680905 | 2.6525374151 |
| C | 6.0  | 0.3554869626  | -0.1485349618 | 1.2469365684 |
| O | 8.0  | 2.6842448273  | 0.6440384575  | 0.0000000000 |
| C | 6.0  | -1.7684286297 | 0.1191908395  | 3.0102024604 |
| C | 6.0  | -0.4327278514 | -0.0042355105 | 3.5024996327 |
| H | 1.0  | 1.6167984954  | -0.2271075517 | 3.0143907344 |
| H | 1.0  | -0.2658354664 | 0.0128227180  | 4.5641871875 |
| H | 1.0  | -2.5874155127 | 0.2240204284  | 3.6950327294 |
| H | 1.0  | -3.0239981474 | 0.2235896609  | 1.2464811383 |



TOTAL ENERGY = -931.3778197803

**Dibenzothiophene-S-oxide-Coordinates: S<sub>1</sub> A' State**

|   |      |               |               |              |
|---|------|---------------|---------------|--------------|
| S | 16.0 | 1.5829020845  | -0.2633677408 | 0.0000000000 |
| C | 6.0  | -1.9596794401 | 0.2692275864  | 1.6259751066 |
| C | 6.0  | -0.9192122873 | -0.0032415458 | 0.7143868070 |
| C | 6.0  | 0.5890854975  | -0.3773201843 | 2.6430980570 |
| C | 6.0  | 0.3467616051  | -0.3455488068 | 1.2560894244 |
| O | 8.0  | 2.5340148372  | 0.8965393819  | 0.0000000000 |
| C | 6.0  | -1.7331832738 | 0.1884672564  | 2.9700782677 |
| C | 6.0  | -0.4542479099 | -0.1440539342 | 3.4875413193 |
| H | 1.0  | 1.5698925008  | -0.6014628613 | 3.0230933807 |
| H | 1.0  | -0.3111858114 | -0.2032489182 | 4.5510169558 |
| H | 1.0  | -2.5360532496 | 0.3910519676  | 3.6559612804 |
| H | 1.0  | -2.9343381237 | 0.5386997095  | 1.2600358786 |

TOTAL ENERGY = -931.3780312157

**Dibenzothiophene-S-oxide-Coordinates: S<sub>2</sub> A'' State**

|   |      |               |               |              |
|---|------|---------------|---------------|--------------|
| S | 16.0 | 1.6745640182  | -0.3407847971 | 0.0000000000 |
| C | 6.0  | -1.9919635521 | 0.2973448789  | 1.6153606780 |
| C | 6.0  | -0.9292543336 | 0.0777018294  | 0.6933532518 |
| C | 6.0  | 0.5833069723  | -0.3927371214 | 2.5978813882 |
| C | 6.0  | 0.3747540696  | -0.2900096779 | 1.2097493827 |
| O | 8.0  | 2.4375048193  | 0.9608445069  | 0.0000000000 |
| C | 6.0  | -1.7568830174 | 0.1628468392  | 2.9422995719 |
| C | 6.0  | -0.4616791902 | -0.1933116248 | 3.4448589823 |
| H | 1.0  | 1.5588567214  | -0.6394889361 | 2.9756777833 |
| H | 1.0  | -0.3268728870 | -0.2967315672 | 4.5056811436 |
| H | 1.0  | -2.5537244054 | 0.3263902461  | 3.6450459364 |
| H | 1.0  | -2.9678916158 | 0.5678346167  | 1.2564888044 |

TOTAL ENERGY = -931.3472646063

## References

1. P. Pouzet, I. Erdelmeier, D. Ginderow, J.-P. Mornon, P. Dansette and D. Mansuy, *J. Chem. Soc., Chem. Commun.*, 1995, 473-474.
2. B. Bak, D. Christensen, L. Hansen-Nygaard and J. Rastrup-Andersen, *J. Mol. Spectrosc.*, 1961, 7, 58-63.
